CORRECTION

# Correction: Influence of Soil Properties on Soldierless Termite Distribution

Thomas Bourguignon, Thomas Drouet, Jan Šobotník, Robert Hanus, Yves Roisin

There are errors in the Funding section; the Internal Grant Agency of Faculty of Forestry and Wood Sciences (Specific research of the Czech University of Life Sciences) (project: A08/14) did not provide any financial support for this study. Instead, support was received from the projects CIGA No. 20154318 and IGA No. B03/15 (Czech University of Life Sciences, Prague).

The complete, correct funding statement should read as follows: Financial support was provided by the Belgian FRIA (fellowship to TB), the French CNRS (Nouragues grant), the Institute of Organic Chemistry and Biochemistry (RVO: 61388963), and the projects CIGA No. 20154318 and IGA No. B03/15 (Czech University of Life Sciences, Prague). TB was supported by the University of Sydney through a postdoctoral fellowship.

## Reference

1. Bourguignon T, Drouet T, Šobotník J, Hanus R, Roisin Y (2015) Influence of Soil Properties on Soldierless Termite Distribution. PLoS ONE 10(8): e0135341. doi:[10.1371/journal.pone.0135341](https://doi.org/10.1371/journal.pone.0135341) PMID: [26270057](https://pubmed.ncbi.nlm.nih.gov/26270057/)

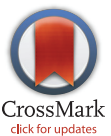

## OPEN ACCESS

**Citation:** Bourguignon T, Drouet T, Šobotník J, Hanus R, Roisin Y (2015) Correction: Influence of Soil Properties on Soldierless Termite Distribution. PLoS ONE 10(11): e0143776. doi:[10.1371/journal.pone.0143776](https://doi.org/10.1371/journal.pone.0143776)

**Published:** November 23, 2015

**Copyright:** © 2015 Bourguignon et al. This is an open access article distributed under the terms of the [Creative Commons Attribution License](https://creativecommons.org/licenses/by/4.0/), which permits unrestricted use, distribution, and reproduction in any medium, provided the original author and source are credited.
